# Supplementary material for: Virulence Factors and Antibiotic Susceptibility of Staphylococcus aureus Isolates in Ready-to-Eat Foods: Detection of S. aureus Contamination and a High Prevalence of Virulence Genes
Source: PubMed Central journal article supplement (PMC4772219; doi:10.3390/ijerph13020199), 2016-02-05
Supplement: ijerph-13-00199-s001.pdf [file ijerph-13-00199-s001.pdf]

## Supplementary Materials: Virulence Factors and Antibiotic Susceptibility of *Staphylococcus aureus* Isolates in Ready-to-Eat Foods: Detection of *S. aureus* Contamination and a High Prevalence of Virulence Genes

Suat Moi Puah, Kek Heng Chua and Jin Ai Mary Anne Tan

**Table S1.** Primer nucleotide sequences for DNA amplification and amplified amplicon sizes of 32 virulence genes of *Staphylococcus aureus*.

| Gene       | Upstream Primer Sequence (5'-3') | Downstream Primer Sequence (5'-3') | Amplicon Size (bp) | Reference |
|------------|----------------------------------|------------------------------------|--------------------|-----------|
| <i>sea</i> | GGTATCAATGTGCGGGTGG              | CGGCACTTTTTTCTCTTCGG               | 102                | [1]       |
| <i>seb</i> | GTATGGTGGTGAAGTACTGAGC           | CCAAATAGTGACGAGTTAGG               | 164                | [1]       |
| <i>sec</i> | AGATGAAGTAGTTGATGTGTATGG         | CACACTTTTAGAATCAACCG               | 451                | [1]       |
| <i>sed</i> | CCAATAATAGGAGAAAATAAAAG          | ATTGGTATTTTTTTTCGTTTC              | 278                | [1]       |
| <i>see</i> | AGGTTTTTTCACAGGTCATCC            | CTTTTTTTTCTTCGGTCAATC              | 209                | [1]       |
| <i>seg</i> | CCAGATTCAAATGCAGAACC             | TGCTATCGACACACTACAACC              | 704                | [2]       |
| <i>seh</i> | CGAAAGCAGAAGATTTACACG            | GACCTTTACTTATTTTCGCTGTC            | 495                | [2]       |
| <i>sei</i> | GACAACAAAAGTTCGAAACTG            | CCATATTCCTTGCCTTACCAG              | 630                | [2]       |
| <i>sej</i> | CATCAGAAGTGTGTTCCGCTAG           | CTGAATTTTACCATCAAAGGTAC            | 142                | [3]       |
| <i>sek</i> | CGCTCAAGGCCGATATAGGAA            | GGTAACCCATCATCTCCTGTGT             | 570                | [4]       |
| <i>sel</i> | CACCAGAATCAC ACCGCT TA           | CTGTTTGATGCTTGCCATTG               | 240                | [5]       |
| <i>sem</i> | CTATTAATCTTTGGGTTAATGGAGAAC      | TTCAGTTTCGACAGTTTTGTTGTCAT         | 326                | [6]       |
| <i>sen</i> | ATGAGATTGTTCTACATAGCTGCAAT       | AACTCTGCTCCCCTGAAC                 | 680                | [6]       |
| <i>seo</i> | AGTTTGTGTAAGAAGTCAAGTGTAGA       | ATCTTTAAATTCAGCAGATATCCATCTAAC     | 180                | [6]       |
| <i>sep</i> | GAATTGCAGGGAAGTCTTT              | ACCAACCGAATCACCAGAAG               | 537                | [4]       |
| <i>seq</i> | GAACCTGAAAAGCTTCAAGGA            | CCAGTTCGGGTGTAACAACA               | 509                | [4]       |
| <i>ser</i> | TTCAGTAAGTGCTAAACCAGATCC         | CTGTGGAGTGCATTGTAACGCC             | 367                | [7]       |
| <i>ses</i> | TTCAGAAATAGCCAATCATTTCAA         | CCTTTTTGTTGAGAGCCGTC               | 195                | [8]       |
| <i>set</i> | GGTGATTATGTAGATGCTTGGG           | TCGGGTGTTACTTCTGTTTGC              | 170                | [8]       |
| <i>seu</i> | ATGGCTCTAAAATTGATGGTTCTA         | GCCAGACTCATAAGGCGAACTA             | 409                | [7]       |

Table S1. Cont.

| Gene         | Upstream Primer Sequence (5'-3') | Downstream Primer Sequence (5'-3') | Amplicon Size (bp) | Reference |
|--------------|----------------------------------|------------------------------------|--------------------|-----------|
| <i>eta</i>   | ACTGTAGGAGCTAGTGCATTTGT          | TGGATACTTTTGTCTATCTTTTTCATCAAC     | 190                | [6]       |
| <i>etb</i>   | ATATCAACGTGAGGGCTCTAGTAC         | CAGATAAAGAGCTTTATACACACATTAC       | 612                | [6]       |
| <i>etd</i>   | CGCAAATACATATGAAGAATCTGA         | TGTCACCTTGTTGCAAATCTATAG           | 452                | [9]       |
| <i>tst</i>   | ACCCCTGTTCCCTTATCATC             | TTTTCAGTATTTGTAACGCC               | 326                | [1]       |
| <i>lukM</i>  | TGGATGTTACCTATGCAACCTAC          | GTTTCGTTCCATATAATGAATCACTAC        | 780                | [6]       |
| <i>lukED</i> | TGAAAAAGGTTCAAAGTTGATACGAG       | TGTATTCGATAGCAAAGCAGTGCA           | 269                | [6]       |
| <i>lukPV</i> | ATCATTAGGTAAAAATGTCTGGACATGATCCA | GCATCAAGTGATTGGATAGCAAAGC          | 433                | [10]      |
| <i>hla</i>   | CTGATTACTATCCAAGAAATTCGATTG      | CTTCCAGCCTACTTTTTTATCAGT           | 209                | [6]       |
| <i>hlb</i>   | GTGCACTTACTGACAATAGTGC           | GTTGATGAGTAGCTACCTTCAGT            | 309                | [6]       |
| <i>hld</i>   | AAGAATTTTTATCTTAATTAAGGAAGGAGTG  | TTAGTGAATTTGTTCACTGTGTCTGA         | 111                | [6]       |
| <i>hlg</i>   | GTCAYAGAGTCCATAATGCATTTAA        | CACCAAATGTATAGCCTAAAGTG            | 535                | [6]       |
| <i>hlg-2</i> | GACATAGAGTCCATAATGCATTYGT        | ATAGTCATTAGGATTAGGTTTCACAAAG       | 390                | [6]       |

## References

1. Mehrotra, M.; Wang, G.; Johnson, W.M. Multiplex PCR for detection of genes for *Staphylococcus aureus* enterotoxins, exfoliative toxins, toxic shock syndrome toxin 1, and methicillin resistance. *J. Clin. Microbiol.* **2000**, *38*, 1032–1035.
2. Mclauchlin, J.; Narayanan, G.L.; Mithani, V.; O'Neill, G. The detection of enterotoxins and toxic shock syndrome toxin genes in *Staphylococcus aureus* by polymerase chain reaction. *J. Food Prot.* **2000**, *63*, 479–488.
3. Monday, S.R.; Bohach, G.A. Use of multiplex PCR to detect classical and newly described pyrogenic toxin genes in staphylococcal isolates. *J. Clin. Microbiol.* **1999**, *37*, 3411–3414.
4. Srinivasan, V.; Sawant, A.A.; Gillespie, B.E.; Headrick, S.J.; Ceasaris, L.; Oliver, S.P. Prevalence of enterotoxin and toxic shock syndrome toxin genes in *Staphylococcus aureus* isolated from milk of cows with mastitis. *Foodborne Pathog. Dis.* **2006**, *3*, 274–283.
5. Cremonesi, P.; Luzzana, M.; Brasca, M.; Morandi, S.; Lodi, R.; Vimercati, C.; Agnellini, D.; Caramenti, G.; Moroni, P.; Castiglioni, B. Development of a multiplex PCR assay for the identification of *Staphylococcus aureus* enterotoxigenic strains isolated from milk and dairy products. *Mol. Cell. Probes* **2005**, *19*, 299–305.
6. Jarraud, S.; Mougel, C.; Thioulouse, J.; Lina, G.; Meugnier, H.; Forey, F.; Nesme, X.; Etienne, J.; Vandenesch, F. Relationships between *Staphylococcus aureus* genetic background, virulence factors, agr groups (alleles), and human disease. *Infect. Immun.* **2002**, *70*, 631–641.
7. Hwang, S.Y.; Kim, S.H.; Jang, E.J.; Kwon, N.H.; Park, Y.K.; Koo, H.C.; Jung, W.K.; Kim, J.M.; Park, Y.H. Novel multiplex PCR for the detection of the *Staphylococcus aureus* superantigen and its application to raw meat isolates in Korea. *Int. J. Food Microbiol.* **2007**, *117*, 99–105.
8. Ono, H.K.; Omoe, K.; Imanishi, K.; Iwakabe, Y.; Hu, D.L.; Kato, H.; Saito, N.; Nakane, A.; Uchiyama, T.; Shinagawa, K. Identification and characterization of two novel staphylococcal enterotoxins, types S and T. *Infect. Immun.* **2008**, *76*, 4999–5005.
9. Nakaminami, H.; Noguchi, N.; Ikeda, M.; Hasui, M.; Sato, M.; Yamamoto, S.; Yoshida, T.; Asano, T.; Senoue, M.; Sasatsu, M. Molecular epidemiology and antimicrobial susceptibilities of 273 exfoliative toxin-encoding-gene-positive *Staphylococcus aureus* isolates from patients with impetigo in Japan. *J. Med. Microbiol.* **2008**, *57*, 1251–1258.
10. Lina, G.; Piemont, Y.; Godail-Gamot, F.; Bes, M.; Peter, M.O.; Gauduchon, V.; Vandenesch, F.; Etienne, J. Involvement of Panton-Valentine leukocidin-producing *Staphylococcus aureus* in primary skin infections and pneumonia. *Clin. Infect. Dis.* **1999**, *29*, 1128–1132.

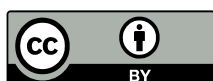

© 2016 by the authors; licensee MDPI, Basel, Switzerland. This article is an open access article distributed under the terms and conditions of the Creative Commons by Attribution (CC-BY) license (<http://creativecommons.org/licenses/by/4.0/>).
